# Supplementary material
Source: publisher site journal article supplement (https://www.dovepress.com/article/431183)
Supplement: Supplementary file 1 [file get_supplementary_file.php]

SUPPLEMENTARY APPENDIX

**Supplementary Figure: Consort Diagram**


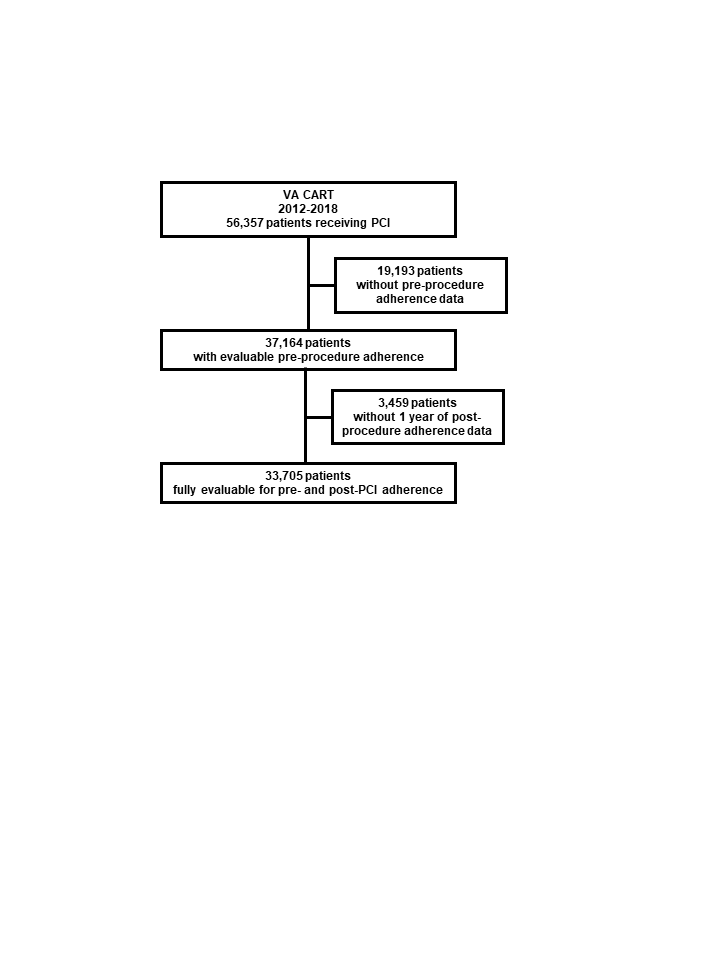


**Supplementary Methods**

Clinical outcomes following PCI were derived from the following ICD and CPT administrative codes

Stroke

'34660','34661','34662','34663','431','43301','43311','43321','43331','43381','43391','43401','43411','43491','99702','G43601','G43609','G43611','G43619','I610','I611','I612','I613','I614','I615','I616','I618','I619','I6300','I63011','I63012','I63013','I63019','I6302','I63031','I63032','I63033','I63039','I6309','I6310','I63111','I63112','I63113','I63119','I6312','I63131','I63132','I63133','I63139','I6319','I6320','I63211','I63212','I63213','I63219','I6322','I63231','I63232','I63233','I63239','I6329','I6330','I63311','I63312','I63313','I63319','I63321','I63322','I63323','I63329','I63331','I63332','I63333','I63339','I63341','I63342','I63343','I63349','I6339','I6340','I63411','I63412','I63413','I63419','I63421','I63422','I63423','I63429','I63431','I63432','I63433','I63439','I63441','I63442','I63443','I63449','I6349','I6350','I63511','I63512','I63513','I63519','I63521','I63522','I63523','I63529','I63531','I63532','I63533','I63539','I63541','I63542','I63543','I63549','I6359','I636','I638','I639','I97810','I97811','I97820','I97821'

Myocardial Infarction

'41000','41001','41010','41011','41020','41021','41030','41031','41040','41041','41050','41051','41060','41061','41070','41071','41080','41081','41090','41091','I2101','I2102','I2109','I2111','I2119','I2121','I2129','I213','I214','I220','I221','I222','I228','I229'

Revascularization (Coronary artery bypass graft, percutaneous coronary intervention)

'92920','92921','92924','92925','92928','92929','92933','92934','92937','92938','92941','92943','92944','92973','92974','92980','92981','92982','92984','92995','92996','C9600','C9601','C9602','C9603','C9604','C9605','C9606','C9607','C9608','G0290','G0291','0066','1755','3606','3607','3609','9227','0270346','027034Z','0270356','027035Z','0270366','027036Z','0270376','027037Z','02703D6','02703DZ','02703E6','02703EZ','02703F6','02703FZ','02703G6','02703GZ','02703T6','02703TZ','02703Z6','02703ZZ','0271346','027134Z','0271356','027135Z','0271366','027136Z','0271376','027137Z','02713D6','02713DZ','02713E6','02713EZ','02713F6','02713FZ','02713G6','02713GZ','02713T6','02713TZ','02713Z6','02713ZZ','0272346','027234Z','0272356','027235Z','0272366','027236Z','0272376','027237Z','02723D6','02723DZ','02723E6','02723EZ','02723F6','02723FZ','02723G6','02723GZ','02723T6','02723TZ','02723Z6','02723ZZ','0273346','027334Z','0273356','027335Z','0273366','027336Z','0273376','027337Z','02733D6','02733DZ','02733E6','02733EZ','02733F6','02733FZ','02733G6','02733GZ','02733T6','02733TZ','02733Z6','02733ZZ','02C03Z6','02C03ZZ','02C13Z6','02C13ZZ','02C23Z6','02C23ZZ','02C33Z6','02C33ZZ','33510','33511','33512','33513','33514','33516','33517','33518','33519','33521','33522','33523','33533','33534','33535','33536','33572','4110F','S2205','S2206','S2207','S2208','S2209','3610','3611','3612','3613','3614','3615','3616','3617','3619','0210083','0210088','0210089','021008C','021008F','021008W','0210093','0210098','0210099','021009C','021009F','021009W','02100A3','02100A8','02100A9','02100AC','02100AF','02100AW','02100J3','02100J8','02100J9','02100JC','02100JF','02100JW','02100K3','02100K8','02100K9','02100KC','02100KF','02100KW','02100Z3','02100Z8','02100Z9','02100ZC','02100ZF','0210344','02103D4','0210444','0210483','0210488','0210489','021048C','021048F','021048W','0210493','0210498','0210499','021049C','021049F','021049W','02104A3','02104A8','02104A9','02104AC','02104AF','02104AW','02104D4','02104J3','02104J8','02104J9','02104JC','02104JF','02104JW','02104K3','02104K8','02104K9','02104KC','02104KF','02104KW','02104Z3','02104Z8','02104Z9','02104ZC','02104ZF','0211083','0211088','0211089','021108C','021108F','021108W','0211093','0211098','0211099','021109C','021109F','021109W','02110A3','02110A8','02110A9','02110AC','02110AF','02110AW','02110J3','02110J8','02110J9','02110JC','02110JF','02110JW','02110K3','02110K8','02110K9','02110KC','02110KF','02110KW','02110Z3','02110Z8','02110Z9','02110ZC','02110ZF','0211344','02113D4','0211444','0211483','0211488','0211489','021148C','021148F','021148W','0211493','0211498','0211499','021149C','021149F','021149W','02114A3','02114A8','02114A9','02114AC','02114AF','02114AW','02114D4','02114J3','02114J8','02114J9','02114JC','02114JF','02114JW','02114K3','02114K8','02114K9','02114KC','02114KF','02114KW','02114Z3','02114Z8','02114Z9','02114ZC','02114ZF','0212083','0212088','0212089','021208C','021208F','021208W','0212093','0212098','0212099','021209C','021209F','021209W','02120A3','02120A8','02120A9','02120AC','02120AF','02120AW','02120J3','02120J8','02120J9','02120JC','02120JF','02120JW','02120K3','02120K8','02120K9','02120KC','02120KF','02120KW','02120Z3','02120Z8','02120Z9','02120ZC','02120ZF','0212344','02123D4','0212444','0212483','0212488','0212489','021248C','021248F','021248W','0212493','0212498','0212499','021249C','021249F','021249W','02124A3','02124A8','02124A9','02124AC','02124AF','02124AW','02124D4','02124J3','02124J8','02124J9','02124JC','02124JF','02124JW','02124K3','02124K8','02124K9','02124KC','02124KF','02124KW','02124Z3','02124Z8','02124Z9','02124ZC','02124ZF','0213083','0213088','0213089','021308C','021308F','021308W','0213093','0213098','0213099','021309C','021309F','021309W','02130A3','02130A8','02130A9','02130AC','02130AF','02130AW','02130J3','02130J8','02130J9','02130JC','02130JF','02130JW','02130K3','02130K8','02130K9','02130KC','02130KF','02130KW','02130Z3','02130Z8','02130Z9','02130ZC','02130ZF','0213344','02133D4','0213444','0213483','0213488','0213489','021348C','021348F','021348W','0213493','0213498','0213499','021349C','021349F','021349W','02134A3','02134A8','02134A9','02134AC','02134AF','02134AW','02134D4','02134J3','02134J8','02134J9','02134JC','02134JF','02134JW','02134K3','02134K8','02134K9','02134KC','02134KF','02134KW','02134Z3','02134Z8','02134Z9','02134ZC','02134ZF'

For assessment of the association of pre-procedural adherence with post-procedural adherence, we initially included the following 54 candidate covariates in the logistic regression model:

Age, race, sex, height, weight, body mass index (BMI), history of heart failure (HF), diabetes, hypertension, hyperlipidemia, chronic kidney disease (CKD), dialysis status, prior stroke/transient ischemic attack (TIA), peripheral arterial disease, atrial fibrillation, deep vein thrombosis, prior cancer diagnosis, sleep apnea, renal transplant, chronic lung disease, liver disease, post-traumatic stress disorder (PTSD), depression, anxiety, bipolar disorder, current or former tobacco use, current or former alcohol abuse, illicit drug use, prior MI, prior PCI, prior CABG, prior cardiac catheterization, prior valve surgery, prior percutaneous valve intervention, family history of coronary artery disease (CAD), ST-segment elevation myocardial infarction (STEMI) presentation, procedural status (elective, urgent, emergent, salvage), cardiogenic shock, cardiac arrest, surgical turn-down, systolic and diastolic blood pressure on presentation, total cholesterol, low-density lipoprotein (LDL), high-density lipoprotein (HDL), Framingham calculated 10-year risk, and pre-procedure adherence status.

After an elimination step to remove covariates with p-value <0.1, the following covariates were retained in the model:

| Variable | Estimate (SE) | OR (95% CI) | p-value |
| --- | --- | --- | --- |
| (Intercept) | 0.616 (0.204) | 1.851 (1.242, 2.760) | 0.003 |
| Pre-procedural Adherence | 0.831 (0.031) | 2.295 (2.158, 2.440) | *<.001* |
| Prior Valve Surgery | -0.334 (0.089) | 0.716 (0.602, 0.852) | *<.001* |
| CHF | -0.171 (0.032) | 0.843 (0.791, 0.899) | *<.001* |
| Cardiogenic Shock | -0.216 (0.112) | 0.806 (0.647, 1.004) | 0.054 |
| Sleep Apnea | 0.113 (0.031) | 1.120 (1.053, 1.191) | *<.001* |
| PTSD | 0.169 (0.037) | 1.184 (1.100, 1.274) | *<.001* |
| Depression | -0.169 (0.033) | 0.844 (0.792, 0.900) | *<.001* |
| Hyperlipidemia | 0.195 (0.064) | 1.215 (1.071, 1.379) | 0.002 |
| PAD | -0.123 (0.033) | 0.884 (0.828, 0.943) | *<.001* |
| Dialysis | -0.287 (0.073) | 0.750 (0.650, 0.866) | *<.001* |
| Tobacco | 0.121 (0.033) | 1.129 (1.059, 1.203) | *<.001* |
| Prior MI | -0.152 (0.031) | 0.859 (0.808, 0.913) | *<.001* |
| Prior PCI | -0.212 (0.031) | 0.809 (0.761, 0.859) | *<.001* |
| Alcohol Abuse | -0.279 (0.051) | 0.756 (0.684, 0.836) | *<.001* |
| AFIB | -0.157 (0.040) | 0.854 (0.790, 0.925) | *<.001* |
| DVT | -0.240 (0.070) | 0.787 (0.686, 0.903) | 0.001 |
| Prior Stroke/TIA | -0.235 (0.044) | 0.790 (0.725, 0.862) | *<.001* |
| Anxiety | 0.096 (0.044) | 1.101 (1.010, 1.201) | 0.030 |
| Substance Abuse/Depend | -0.339 (0.066) | 0.713 (0.626, 0.811) | *<.001* |
| Cancer | -0.145 (0.041) | 0.865 (0.798, 0.937) | *<.001* |
| Age | 0.006 (0.002) | 1.006 (1.002, 1.010) | 0.003 |
| Race | 0.058 (0.011) | 1.060 (1.038, 1.083) | *<.001* |
| Bp-Diastolic | -0.001 (0.001) | 0.999 (0.996, 1.001) | 0.350 |
| HDL | -0.004 (0.001) | 0.996 (0.994, 0.998) | *<.001* |
| Framingham 10yr Risk | -0.010 (0.002) | 0.990 (0.987, 0.993) | *<.001* |
| Status: EMERGENT | -0.226 (0.066) | 0.797 (0.701, 0.907) | 0.001 |
| Status: SALVAGE | -0.248 (0.409) | 0.780 (0.350, 1.741) | 0.545 |
| Status: URGENT | -0.073 (0.031) | 0.930 (0.876, 0.987) | 0.018 |
